# Supplementary material for: Comparison of hoop-net trapping and visual surveys to monitor abundance of the Rio Grande cooter (Pseudemys gorzugi)
Source: PeerJ journal article supplement (doi:10.7717/peerj.4677), 2018-05-11
Supplement: PeerJ_R_Code.pdf [file PeerJ_R_Code.pdf]

A. R code used for estimating abundance of *Pseudemys gorzugi* using capture-recapture data

*#Organize data*

```
captures=matrix(c(0,0,1,0,0,0,
  0,0,1,0,0,0,
  0,0,1,0,0,0,
  0,0,1,0,0,0,
  0,0,1,0,0,0,
  0,0,0,1,0,0,
  0,0,0,1,0,0,
  0,0,0,1,0,0,
  0,0,0,1,0,0,
  0,0,0,1,0,0,
  0,0,0,1,0,0,
  0,0,0,1,0,0,
  0,0,0,1,0,0,
  0,0,0,1,0,0,
  0,0,0,1,0,0,
  0,0,0,0,1,0,
  0,0,0,0,1,0,
  0,0,0,0,1,0,
  0,0,0,0,1,0,
  0,0,0,0,1,0,
  0,0,0,0,1,0,
  0,0,0,0,1,0,
  0,0,0,0,1,0,
  0,0,0,0,0,1,
  0,0,0,0,0,1,
  0,0,0,0,0,1,
  0,0,0,0,0,1,
  0,0,0,0,0,1,
  1,0,0,0,0,0,
  1,0,0,0,0,0,
  0,1,0,0,0,0,
  0,1,0,0,0,0,
  0,0,1,0,0,0,
  0,0,1,0,0,0,
  0,0,1,1,0,0,
  0,0,1,0,0,0,
  0,0,1,0,0,0,
  0,0,1,0,0,0,
  0,0,0,0,0,1,
  0,0,0,0,0,1,
  0,0,0,0,0,1,
  1,0,0,0,0,0,
  0,1,0,0,0,0,
  0,1,0,0,0,0,
  0,1,0,1,1,0,
```

0,1,0,0,0,0,  
0,0,1,0,0,0,  
0,0,1,0,0,0,  
0,0,1,0,1,0,  
0,0,1,0,0,0,  
0,0,1,0,0,0,  
0,0,1,0,0,0,  
0,0,1,0,0,0,  
0,0,1,1,0,0,  
0,0,1,0,0,0,  
0,0,0,1,0,0,  
0,0,0,0,1,0,  
0,0,0,0,1,0,  
0,0,0,0,1,0,  
0,0,0,0,0,1,  
0,0,1,0,0,1,  
0,0,0,0,0,1,  
1,0,0,0,0,0,  
1,0,0,0,0,0,  
1,0,0,0,0,0,  
0,1,0,0,0,0,  
1,0,0,0,0,0,  
0,1,0,0,0,0,  
0,1,0,0,0,0,  
0,0,0,1,0,0,  
0,0,0,0,1,0,  
0,0,0,0,1,0,  
0,0,0,0,1,0,  
0,0,0,0,1,0,  
0,0,0,0,1,0,  
0,0,0,0,0,1,  
1,0,0,0,0,0,  
1,0,0,0,0,0,  
1,0,1,0,0,0,  
1,0,0,0,0,0,  
1,0,0,1,0,0,  
1,0,0,0,0,0,  
1,0,0,0,0,0,  
1,0,0,1,0,0,  
1,0,1,0,0,0,  
0,1,0,0,0,0,  
0,1,0,1,0,1,  
0,1,0,0,0,0,  
0,1,1,0,0,0,  
0,0,1,0,0,0,  
0,0,1,0,0,0,  
0,0,0,1,0,0,  
0,0,0,1,0,0,  
0,0,0,0,0,1,

0,0,0,0,1,0,  
0,0,0,0,1,1,  
1,0,0,0,0,0,  
0,0,1,0,0,0,  
0,0,1,0,0,0,  
0,0,0,0,1,0,  
0,0,0,0,0,1,  
0,1,0,0,0,0,  
0,1,0,0,0,1,  
0,0,0,1,0,0,  
0,0,0,1,0,0,  
0,0,0,1,0,0,  
0,0,0,0,1,0,  
0,0,0,0,1,0,  
0,0,0,0,0,1,  
0,0,0,0,0,1,  
0,0,0,0,0,1,  
0,0,0,0,0,1,  
1,0,0,0,0,0,  
0,0,1,0,0,0,  
1,0,0,0,0,0,  
1,0,0,0,1,0,  
1,0,0,1,0,0,  
0,1,0,0,0,0,  
0,1,0,0,0,0,  
0,1,0,0,0,0,  
1,0,0,1,0,1,  
0,0,0,1,1,1,  
0,0,0,0,1,0,  
0,0,0,0,0,1,  
1,0,1,0,0,1,  
1,0,0,0,0,0,  
0,1,0,0,0,0,  
0,0,1,1,0,0,  
0,0,0,1,0,0,  
0,0,0,0,0,1,  
1,0,1,0,0,0,  
1,0,0,0,0,0,  
1,1,0,0,0,0,  
1,0,0,0,0,1,  
1,0,0,0,0,0,  
1,0,1,1,0,0,  
1,0,0,0,0,0,  
1,0,0,1,0,0,  
0,1,0,1,1,0,  
0,0,1,0,0,0,  
0,0,0,1,0,0,  
0,0,0,1,0,0,

```

0,0,0,0,1,0,
0,0,0,0,1,0,
1,1,0,0,0,0,
0,1,0,0,0,0,
0,1,0,0,0,0,
1,0,1,0,0,0,
0,0,1,0,0,0,
0,1,0,0,0,0,
0,0,1,0,0,0,
0,0,0,0,0,1,
1,0,0,0,0,0,
1,0,0,0,0,0,
1,0,0,0,0,0,
1,0,0,0,0,0,
0,0,1,0,0,0,
0,1,0,0,0,0,
0,1,0,0,0,0,
0,0,1,0,0,0,
0,1,0,0,0,0,
0,0,0,1,0,0,
0,1,0,0,0,0,
0,0,1,0,0,0,
0,0,1,0,0,0,
0,0,0,0,1,0,
0,0,0,0,1,0,
0,0,0,0,1,0,
0,0,1,0,0,0,
1,0,0,0,0,0,
0,0,0,0,0,1,
0,0,1,0,0,0,
0,0,1,0,0,0,
0,0,1,0,0,0,
0,0,1,0,0,0,
0,0,0,0,1,0,
0,1,1,0,0,0,
1,0,0,0,0,0,
0,0,1,0,0,0),ncol=6,byrow=T)

```

```

Individual=c("2","3","4","5","6","7","8","9","10","11","12","13","14","15","16","18","19","20","21","23",
"24","25","26","29","30","31","32","33","34",
"35","36","37","38","39","40","41","42","43","44","45","46","51","55","56","57","58","61","62","63","6
6","67","68","69","70","71","72",
"73","74","75","76","77","78","79","80","81","82","83","84","86","90","91","92","93","94","96","97","9
8","99","100","101","102","103",
"104","105","106","107","108","109","112","113","116","117","118","1002","7018","100D","1949H","1
960H","1975H","1997H","2004H","2007H",

```

"2018H","2019H","2020H","2021H","2022H","2030H","2031H","2033H","2043H","2057H","2057H","2058H","2059H","2060H","2069H","2073H","2074H",  
"2096H","2114H","2115H","2123H","2146H","2155H","2159H","2176H","2187H","2212H","2221H","2223H","2227H","2228H","2229H","2233H","2234H",  
"2235H","2237H","2258H","2277H","2280H","2288H","2290H","83c0325","83c0335","83c0336","83c0340","83c0341","83c034c","83c0356","83c0358",  
"83c0365","83c036a","83c0372","83c037b","83c339a","83c33b3","83c33bf","83c33D4","852ee23","852ee28","852ee38","852ee3a","852ee3e",  
"852ee3f","852ee40","852ee4a","852ee51","852ee55","852ee56","852ee5c","852ee68","852ee6a","852ee73","852ee74","852ee79","852ee7b",  
"852ee7d","852ee83")

Stage=c("female","female","male","male","male","male","male","male","male","male","male","female","male",  
"male","male","Juvenile","female","female","female",  
"female","female","female","male","Juvenile","Juvenile","male","male","female","male","male","female",  
"male","female","female","female","male",  
"male","male","male","female","male","male","male","male","male","male","female","female","female",  
"female","male","male","female","male",  
"female","female","male","male","female","female","female","female","male","female","female","male",  
"male","male","female","male","male",  
"male","male","female","female","male","female","female","female","female","male","female","female",  
"male","male","male","male","female",  
"male","male","female","male","female","male","female","male","female","hatchling","hatchling","hatchling",  
"hatchling","hatchling","hatchling",  
"hatchling","hatchling","hatchling","hatchling","hatchling","hatchling","hatchling","hatchling","hatchling",  
"hatchling","hatchling",  
"hatchling","hatchling","hatchling","hatchling","hatchling","hatchling","hatchling","hatchling","hatchling",  
"hatchling","hatchling",  
"hatchling","hatchling","hatchling","hatchling","hatchling","hatchling","hatchling","hatchling","hatchling",  
"hatchling","hatchling",  
"hatchling","hatchling","hatchling","hatchling","hatchling","hatchling","hatchling","hatchling","hatchling",  
"Juvenile","Juvenile",  
"Juvenile","Juvenile","Juvenile","Juvenile","Juvenile","Juvenile","Juvenile","Juvenile","Juvenile","Juvenile","male",  
"Juvenile","male","Juvenile",  
"Juvenile","Juvenile","female","Juvenile","male","female","male","male","male","male","female","male",  
"Juvenile","female","female","male",  
"female","Juvenile","male","male","male")

AH=c("A","A","A","A","A","A","A","A","A","A","A","A","A","A","A","A","A","A","A","A","A","A","A",  
"A","A","A","A","A","A","A","A","A","A",  
"A","A","A","A","A","A","A","A","A","A","A","A","A","A","A","A","A","A","A","A","A","A","A",  
"A","A","A","A","A","A","A","A","A",  
"A","A","A","A","A","A","A","A","A","A","A","A","A","A","A","A","A","A","A","A","A","A",  
"H","H","H","H","H","H","H","H","H",  
"H","H","H","H","H","H","H","H","H","H","H","H","H","H","H","H","H","H","H","H","H","H",  
"H","H","H","H","H","H","H","H","H",  
"H","H","H","A","A","A","A","A","A","A","A","A","A","A","A","A","A","A","A","A","A","A",  
"A","A","A","A","A","A","A","A",  
"A","A","A","A")

```

Site=c("BLM1","BLM1","BLM1","BLM1","BLM1","BLM1","BLM1","BLM1","BLM1","BLM1",
"BLM1","BLM1","BLM1","BLM1","BLM1","BLM1","BLM1","BLM1","BLM1","BLM1",
"BLM2","BLM2","BLM2","BLM2","BLM2","BLM2","BLM2","BLM2",
"BLM2","JD","JD","JD","JD","JD","JD","JD","JD","JD","JD","JD","JD","JD","JD","JD",
"L1","L1","L1","L1","JD","L1",
"L1","L1","L1","L1","L1","L1","L1","L2","L2","L2","L2","L2","L2","L2","L2","L2","L2",
"L2","L2","L2","L2","BLM1",
"BLM1","BLM2","BLM1","BLM1","BLM1","BLM1","BLM2","BLM2","BLM2","BLM2","BLM2","BLM2",
"BLM2","BLM2","BLM2","BLM2","BLM2","JD","L1","JD","JD",
"JD","JD","JD","JD","JD","JD","JD","L1","L1","L1","L1","L1","L1","L2","L2","L2","L2","L2",
"L2","L2","L2","L2","L2","L2",
"L1","JD","L1","JD","JD","JD","JD","BLM1","L1","JD","L1","JD","L1","L1","L1","L1","L2","L2","L2","L2","L1",
"L2","L1","L1","L1","L1","L2","L1",
"L1","L1","L1","L2","L2","L2","L2","L1")
Loc=c("UpDistance","UpDistance","UpDistance","UpDistance","UpDistance","UpDistance","UpDistance",
"UpDistance","UpDistance","UpDistance","UpDistance",
"UpDistance","UpDistance","UpDistance","UpDistance","UpDistance","UpDistance","UpDistance","UpDistance",
"UpDistance","UpDistance","UpDistance","UpDistance",
"UpDistance","UpDistance","UpDistance","UpDistance","UpDistance","UpDistance","UpDistance","UpDistance",
"UpDistance","UpDistance","UpDistance","UpDistance","UpDistance","UpDistance","UpDistance","UpDistance",
"Down","Down","Down","Down","Down",
"Down","Down","Down","Down","Down","Down","Down","Down","Down","Down","Down","Down","Down","Down",
"Down","Down","Down","Down","Down","Down","Down","Down","Down","Down","Down","Down","Down","Down",
"Down","Down","Down","Down","Down","Down","Down","Down","Down","Down","Down","Down","Down","Down",
"Down","Down","Down","Down","Down","Down","Down","Down","UpDistance","UpDistance","UpDistance","UpDistance",
"UpDistance","UpDistance","UpDistance","UpDistance",
"UpDistance","UpDistance","UpDistance","UpDistance","UpDistance","UpDistance","UpDistance","UpDistance",
"UpDistance","UpDistance","UpDistance","UpDistance",
"Down","Down","Down","Down","Down","Down","Down","Down","Down","Down","Down","Down","Down","Down",
"Down","Down","Down","Down","Down","Down","Down","Down","Down",
"Down","Down","Down","Down","Down","Down","Down","Down","Down","Down","Down","Down","Down","Down",
"Down","Down","Down","Down","Down","Down","Down","Down",
"UpDistance","Down","Down","Down","Down","Down","Down","Down","Down","Down","Down","Down","Down",
"Down","Down","Down","Down","Down","Down","Down","Down",
"Down","Down","Down","Down","Down","Down","Down","Down","Down","Down","Down","Down")
first=cbind(Individual,Stage,AH,Loc)
data=data.frame(first,captures)
colnames(data) <- c("Individual","Stage","AH","Loc","Day1","Day2","Day3","Day4","Day5","Day6")
data
table(Stage)

#subset and format data
females=subset(data,Stage=="female")
hatchlings=subset(data,Stage=="hatchling")

```

```

juveniles=subset(data,Stage=="Juvenile")
males=subset(data,Stage=="male")

#upstream (site 1) vs. downstream (site 2) and analysis of hatchlings and adults separately
# Specify model in BUGS language
sink("Huggins.BUGS")
cat("
  model{ ### capture probability model parameters
    for (i in 1:2)
    {
      beta[i]~dnorm(0,0.37)
    }
    betaOffset~dnorm(0,0.37)

    #multinomial likelihood for animals captured
    for (i in 1: nhist)
    {
      for (j in 1:occas)
      {
        ### log odds capture model
        logit(cap.pzUP[i,j])<- beta[1] + beta[2]*recap[i,j] + betaOffset
        cap.pUP[i,j]<- min(0.999,max(0.001,cap.pzUP[i,j]))
        cUP[i,j]<- pow(cap.pUP[i,j],X[i,j])*pow(1-cap.pUP[i,j],1-X[i,j])
        logit(cap.pzDOWN[i,j])<- beta[1] + beta[2]*recap[i,j]
        cap.pDOWN[i,j]<- min(0.999,max(0.001,cap.pzDOWN[i,j]))
        cDOWN[i,j]<- pow(cap.pDOWN[i,j],X[i,j])*pow(1-cap.pDOWN[i,j],1-X[i,j])

      }
      etaUP[i]<-prod(cUP[i,])
      etaDOWN[i]<-prod(cDOWN[i,])
    }
    totUP<-sum(etaUP[])
    totDOWN<-sum(etaDOWN[])

    for (i in 1:nhist) {xiUP[i]<-etaUP[i]/totUP}
    for (i in 1:nhist) {xiDOWN[i]<-etaDOWN[i]/totDOWN}

    ## number marked individuals
    udotUP<-sum(fUP[])
    fUP[1:nhist]~dmulti(xiUP[1:nhist],udotUP)

    udotDOWN<-sum(fDOWN[])
    fDOWN[1:nhist]~dmulti(xiDOWN[1:nhist],udotDOWN)

    # estimate probability first capture by occasion
    for (z in 1:occas){
      logit(pUP[z])<-beta[1]
      p00.unctUP[z] <- (1-pUP[z])

```

```

p00UP[z] <- cut(p00.unctUP[z])
}

# estimate probability first capture by occasion
for (z in 1:occas){
  logit(pDOWN[z])<-beta[1]
  p00.unctDOWN[z] <- (1-pDOWN[z])
  p00DOWN[z] <- cut(p00.unctDOWN[z])
}

#probability that animal is caught before end of study
pi0UP<-1-prod(p00UP[])
#prior on abundance
lambdaUP~dunif(0,10000)
## notice the minimum is the number caught and marked
NUP<-round(lambdaUP+udotUP)
#binomial likelihood for abundance
udotUP~dbin(pi0UP,NUP)

#derived parameters
logit(captureProbUP)<-beta[1]+betaOffset
logit(recaptureProbUP)<-beta[1]+beta[2]+betaOffset

#probability that animal is caught before end of study
pi0DOWN<-1-prod(p00DOWN[])
#prior on abundance
lambdaDOWN~dunif(0,10000)
## notice the minimum is the number caught and marked
NDOWN<-round(lambdaDOWN+udotDOWN)
#binomial likelihood for abundance
udotDOWN~dbin(pi0DOWN,NDOWN)

#derived parameters
logit(captureProbDOWN)<-beta[1]
logit(recaptureProbDOWN)<-beta[1]+beta[2]

Ntot<-NUP+NDOWN
} ",fill = TRUE)
sink()

#model setup
inits<-NULL
params<-
c("Ntot","NUP","captureProbUP","recaptureProbUP","NDOWN","captureProbDOWN","recaptureProbDOWN","beta","betaOffset")
niter=250000
nburn=125000
nthin=1

```



```
nchains=3
```

```
#Hatchling analysis
```

```
# BUGSdata<-
```

```
list(X=Cap,nhist=nrow(Cap),occas=ncol(Cap),recap=Recap,fUP=fHatchlingsUp,fDOWN=fHatchlingsDown)
```

```
# ZZ1<-bugs(data=BUGSdata,init=init,parameters=params,
```

```
#     model="Huggins.BUGS",n.chains=nchains,n.thin=nthin,n.iter=niter,n.burnin=nburn,debug=F,
```

```
#     bugs.directory="C:/Users/duartead/Documents/WinBUGS14")
```

```
# print(ZZ1,digits=3)
```

```
# > print(ZZ1,digits=3)
```

```
# Inference for Bugs model at "Huggins.BUGS", fit using WinBUGS,
```

```
# 3 chains, each with 250000 iterations (first 125000 discarded)
```

```
# n.sims = 375000 iterations saved
```

```
#           mean  sd  2.5%  25%  50%  75%  97.5%  Rhat  n.eff
```

```
# Ntot           54.318 8.151 48.000 50.000 52.000 56.000 74.000 1.001 18000
```

```
# NUP            17.471 2.998 15.000 16.000 17.000 18.000 25.000 1.001 24000
```

```
# captureProbUP   0.069 0.044 0.011 0.036 0.060 0.093 0.177 1.001 130000
```

```
# recaptureProbUP 0.047 0.034 0.007 0.023 0.039 0.062 0.136 1.001 52000
```

```
# NDOWN          36.847 5.772 32.000 34.000 35.000 38.000 51.000 1.001 20000
```

```
# captureProbDOWN 0.330 0.079 0.167 0.278 0.333 0.386 0.478 1.001 15000
```

```
# recaptureProbDOWN 0.240 0.053 0.146 0.203 0.237 0.274 0.351 1.001 95000
```

```
# beta[1]         -0.733 0.387 -1.608 -0.953 -0.695 -0.466 -0.087 1.001 14000
```

```
# beta[2]         -0.441 0.413 -1.213 -0.720 -0.454 -0.183 0.420 1.001 10000
```

```
# betaOffset      -2.084 0.777 -3.743 -2.565 -2.038 -1.546 -0.686 1.001 97000
```

```
# deviance        87.460 4.712 81.980 84.340 86.480 89.420 98.230 1.001 23000
```

```
#
```

```
# For each parameter, n.eff is a crude measure of effective sample size,
```

```
# and Rhat is the potential scale reduction factor (at convergence, Rhat=1).
```

```
#
```

```
# DIC info (using the rule,  $pD = Dbar - Dhat$ )
```

```
#  $pD = 2.3$  and  $DIC = 89.8$ 
```

```
# DIC is an estimate of expected predictive error (lower deviance is better).
```

```
#Adult analysis
```

```
BUGSdata<-
```

```
list(X=Cap,nhist=nrow(Cap),occas=ncol(Cap),recap=Recap,fUP=fAdultUp,fDOWN=fAdultDown)
```

```
ZZ2<-bugs(data=BUGSdata,init=init,parameters=params,
```

```
      model="Huggins.BUGS",n.chains=nchains,n.thin=nthin,n.iter=niter,n.burnin=nburn,debug=F,
```

```
      bugs.directory="C:/Users/duartead/Documents/WinBUGS14")
```

```
print(ZZ2,digits=3)
```

```
# > print(ZZ2,digits=3)
```

```
# Inference for Bugs model at "Huggins.BUGS", fit using WinBUGS,
```

```
# 3 chains, each with 250000 iterations (first 125000 discarded)
```

```
# n.sims = 375000 iterations saved
```

```
#           mean  sd  2.5%  25%  50%  75%  97.5%  Rhat  n.eff
```

```
# Ntot           194.414 58.734 148.000 166.000 181.000 206.000 317.000 1.001 15000
```

```
# NUP            66.414 20.759 49.000 56.000 62.000 71.000 110.000 1.001 15000
```

```
# captureProbUP   0.048 0.026 0.011 0.028 0.044 0.063 0.112 1.001 100000
```

```

# recaptureProbUP    0.019 0.012 0.004 0.010 0.016 0.024 0.048 1.001 380000
# NDOWN              127.999 39.778 96.000 108.000 119.000 136.000 211.000 1.001 18000
# captureProbDOWN    0.197 0.053 0.090 0.162 0.198 0.234 0.298 1.001 16000
# recaptureProbDOWN  0.082 0.020 0.048 0.068 0.080 0.094 0.124 1.001 70000
# beta[1]            -1.444 0.375 -2.312 -1.646 -1.396 -1.186 -0.856 1.001 17000
# beta[2]            -1.004 0.424 -1.769 -1.288 -1.027 -0.749 -0.101 1.001 36000
# betaOffset         -1.700 0.647 -3.080 -2.102 -1.661 -1.253 -0.543 1.001 380000
# deviance           123.679 7.337 117.900 120.000 122.100 125.200 138.700 1.001 42000
#
# For each parameter, n.eff is a crude measure of effective sample size,
# and Rhat is the potential scale reduction factor (at convergence, Rhat=1).
#
# DIC info (using the rule, pD = Dbar-Dhat)
# pD = 4.3 and DIC = 127.9
# DIC is an estimate of expected predictive error (lower deviance is better).
#

```

B. R code used for estimating density of *Pseudemys gorzugi* using visual distance sampling  
The following example is for the fifth visual survey of adult turtles

*#Organize the data*

```

DisFifth<-read.csv("C:\\Users\\Ivana\\Documents\\Distance In R gorzugi\\Adults
Distance\\FifthSurvey.csv",header=T,sep=",")

```

```

> DisFifth

```

```

  transect distance
1      e      1
2      e      1
3      e      1
4      e      2
5      e      2
6      e      2
7      e      2
8      e      3
9      e      3
10     e      3
11     e      3
12     e      3
13     e      3
14     e      3
15     e      4
16     e      4
17     e      4
18     e      5
19     e      5
20     e      5
21     e      5
22     e      5

```

```

23   e   5
24   e   5
25   e   5
26   e   5
27   e   6
28   e   6
29   e   6
30   e   6
31   e   6
32   e   7
33   e   7
34   e   7
35   e   7
36   e   7
37   e   9

```

```
> DisFifthFormat<-
```

```
formatDistData(DisFifth,distCol="distance",transectNameCol="transect",dist.breaks=c(0,2,4,6,8,10))
```

```
> DisFifthFormat
```

```
  [0,2] (2,4] (4,6] (6,8] (8,10]
```

```
e  7  10  14  5  1
```

```
> DisFifthFrame<-
```

```
unmarkedFrameDS(y=as.matrix(DisFifthFormat),survey="line",dist.breaks=c(0,2,4,6,8,10),tlength=rep(15
00,1),unitsIn="m")
```

```
> DisFifthFrame
```

```
Data frame representation of unmarkedFrame object.
```

```
  y.1 y.2 y.3 y.4 y.5
```

```
e  7 10 14  5  1
```

```
#Running the model
```

```
> hn_Fifth_Null<-distsamp(~1~1,DisFifthFrame,keyfun="halfnorm",output="density",unitsOut="ha")
```

```
> hn_Fifth_Null
```

```
Call:
```

```
distsamp(formula = ~1 ~ 1, data = DisFifthFrame, keyfun = "halfnorm",
  output = "density", unitsOut = "ha")
```

```
Density:
```

```
Estimate SE z P(>|z|)
2.97 0.221 13.4 3.67e-41
```

```
Detection:
```

```
Estimate SE z P(>|z|)
1.68 0.206 8.17 2.99e-16
```

```
AIC: 29.94842
```

```
#Backtransforming the density estimates and deriving abundance estimates
```

```
> backTransform(hn_Fifth_Null,type="state")
```

```
Backtransformed linear combination(s) of Density estimate(s)
```

| Estimate | SE   | LinComb | (Intercept) |
|----------|------|---------|-------------|
| 19.6     | 4.33 | 2.97    | 1           |

Transformation: exp

```
> plotArea.inHectares<-1500*20/10000
> hnFifth.density<-predict(hn_Fifth_Null,type="state")$Predicted
> hnFifth.abundance<-hnFifth.density*plotArea.inHectares
(FifthN.hat<-sum(hnFifth.abundance)) #abundance estimate
[1] 58.68755
> FifthgetN.hat<-function(fit){
+ d<-predict(fit,type="state")$Predicted
+ a<-d*(1500*20/10000)
+ FifthN.hat<-c(FifthN.hat=sum(a))
+ return(FifthN.hat)
+ }
> Fifthpb<-parboot(hn_Fifth_Null,statistic=FifthgetN.hat,nsim=1000)
> Fifthpb
```
