# Supplementary material for: Comparison of hoop-net trapping and visual surveys to monitor abundance of the Rio Grande cooter (Pseudemys gorzugi)
Source: PeerJ. 2018 May 11;6:e4677. doi: 10.7717/peerj.4677 (PMC5951123; doi:10.7717/peerj.4677)
Supplement: Supplemental Information 1 — Raw capture recapture data set used to derive abundance estimates of Rio Grande cooter. [file peerj-06-4677-s001.xlsx]

## Sheet: fjdk
Mark	Survey 1	Survey 2	Survey 3	Survey 4	Survey 5	Survey 6	Class	Site
2	0	0	1	0	0	0	Adult	Upstream
3	0	0	1	0	0	0	Adult	Upstream
4	0	0	1	0	0	0	Adult	Upstream
5	0	0	1	0	0	0	Adult	Upstream
6	0	0	1	0	0	0	Adult	Upstream
7	0	0	1	0	0	0	Adult	Upstream
8	0	0	0	1	0	0	Adult	Upstream
9	0	0	0	1	0	0	Adult	Upstream
10	0	0	0	1	0	0	Adult	Upstream
11	0	0	0	1	0	0	Adult	Upstream
12	0	0	0	1	0	0	Adult	Upstream
13	0	0	0	1	0	0	Adult	Upstream
14	0	0	0	1	0	0	Adult	Upstream
15	0	0	0	1	0	0	Adult	Upstream
16	0	0	0	1	0	0	Adult	Upstream
18	0	0	0	0	1	0	Adult	Upstream
19	0	0	0	0	1	0	Adult	Upstream
20	0	0	0	0	1	0	Adult	Upstream
21	0	0	0	0	1	0	Adult	Upstream
23	0	0	0	0	1	0	Adult	Upstream
24	0	0	0	0	1	0	Adult	Upstream
25	0	0	0	0	1	0	Adult	Upstream
26	0	0	0	0	1	0	Adult	Upstream
29	0	0	0	0	0	1	Adult	Upstream
30	0	0	0	0	0	1	Adult	Upstream
31	0	0	0	0	0	1	Adult	Upstream
32	0	0	0	0	0	1	Adult	Upstream
33	0	0	0	0	0	1	Adult	Upstream
34	1	0	0	0	0	0	Adult	Upstream
35	1	0	0	0	0	0	Adult	Upstream
36	0	1	0	0	0	0	Adult	Upstream
37	0	1	0	0	0	0	Adult	Upstream
38	0	0	1	0	0	0	Adult	Upstream
39	0	0	1	0	0	0	Adult	Upstream
40	0	0	1	1	0	0	Adult	Upstream
41	0	0	1	0	0	0	Adult	Upstream
42	0	0	1	0	0	0	Adult	Upstream
43	0	0	1	0	0	0	Adult	Upstream
44	0	0	0	0	0	1	Adult	Upstream
45	0	0	0	0	0	1	Adult	Upstream
46	0	0	0	0	0	1	Adult	Upstream
51	1	0	0	0	0	0	Adult	Downstream
55	0	1	0	0	0	0	Adult	Downstream
56	0	1	0	0	0	0	Adult	Downstream
57	0	1	0	1	1	0	Adult	Downstream
58	0	1	0	0	0	0	Adult	Downstream
61	0	0	1	0	0	0	Adult	Downstream
62	0	0	1	0	0	0	Adult	Downstream
63	0	0	1	0	1	0	Adult	Downstream
66	0	0	1	0	0	0	Adult	Downstream
67	0	0	1	0	0	0	Adult	Downstream
68	0	0	1	0	0	0	Adult	Downstream
69	0	0	1	1	0	0	Adult	Downstream
70	0	0	1	0	0	0	Adult	Downstream
71	0	0	0	1	0	0	Adult	Downstream
72	0	0	0	0	1	0	Adult	Downstream
73	0	0	0	0	1	0	Adult	Downstream
74	0	0	0	0	1	0	Adult	Downstream
75	0	0	0	0	0	1	Adult	Downstream
76	0	0	1	0	0	1	Adult	Downstream
77	0	0	0	0	0	1	Adult	Downstream
78	1	0	0	0	0	0	Adult	Downstream
79	1	0	0	0	0	0	Adult	Downstream
80	1	0	0	0	0	0	Adult	Downstream
81	0	1	0	0	0	0	Adult	Downstream
82	1	0	0	0	0	0	Adult	Downstream
83	0	1	0	0	0	0	Adult	Downstream
84	0	1	0	0	0	0	Adult	Downstream
86	0	0	0	1	0	0	Adult	Downstream
90	0	0	0	0	1	0	Adult	Downstream
91	0	0	0	0	1	0	Adult	Downstream
92	0	0	0	0	1	0	Adult	Downstream
93	0	0	0	0	1	0	Adult	Downstream
94	0	0	0	0	1	0	Adult	Downstream
96	0	0	0	0	0	1	Adult	Downstream
97	1	0	0	0	0	0	Adult	Downstream
98	1	0	0	0	0	0	Adult	Downstream
99	1	0	1	0	0	0	Adult	Downstream
100	1	0	0	0	0	0	Adult	Downstream
101	1	0	0	1	0	0	Adult	Downstream
102	1	0	0	0	0	0	Adult	Downstream
103	1	0	0	0	0	0	Adult	Downstream
104	1	0	0	1	0	0	Adult	Downstream
105	1	0	1	0	0	0	Adult	Downstream
106	0	1	0	0	0	0	Adult	Downstream
107	0	1	0	1	0	1	Adult	Downstream
108	0	1	0	0	0	0	Adult	Downstream
109	0	1	1	0	0	0	Adult	Downstream
112	0	0	1	0	0	0	Adult	Downstream
113	0	0	1	0	0	0	Adult	Downstream
116	0	0	0	1	0	0	Adult	Downstream
117	0	0	0	1	0	0	Adult	Downstream
118	0	0	0	0	0	1	Adult	Downstream
1002	0	0	0	0	1	0	Adult	Upstream
7018	0	0	0	0	1	1	Adult	Upstream
100D	1	0	0	0	0	0	Adult	Upstream
1949H	0	0	1	0	0	0	Juvenile	Upstream
1960H	0	0	1	0	0	0	Juvenile	Upstream
1975H	0	0	0	0	1	0	Juvenile	Upstream
1997H	0	0	0	0	0	1	Juvenile	Upstream
2004H	0	1	0	0	0	0	Juvenile	Upstream
2007H	0	1	0	0	0	1	Juvenile	Upstream
2018H	0	0	0	1	0	0	Juvenile	Upstream
2019H	0	0	0	1	0	0	Juvenile	Upstream
2020H	0	0	0	1	0	0	Juvenile	Upstream
2021H	0	0	0	0	1	0	Juvenile	Upstream
2022H	0	0	0	0	1	0	Juvenile	Upstream
2030H	0	0	0	0	0	1	Juvenile	Upstream
2031H	0	0	0	0	0	1	Juvenile	Upstream
2033H	0	0	0	0	0	1	Juvenile	Upstream
2043H	0	0	0	0	0	1	Juvenile	Upstream
2057H	1	0	0	0	0	0	Juvenile	Downstream
2057H	0	0	1	0	0	0	Juvenile	Downstream
2058H	1	0	0	0	0	0	Juvenile	Downstream
2059H	1	0	0	0	1	0	Juvenile	Downstream
2060H	1	0	0	1	0	0	Juvenile	Downstream
2069H	0	1	0	0	0	0	Juvenile	Downstream
2073H	0	1	0	0	0	0	Juvenile	Downstream
2074H	0	1	0	0	0	0	Juvenile	Downstream
2096H	1	0	0	1	0	1	Juvenile	Downstream
2114H	0	0	0	1	1	1	Juvenile	Downstream
2115H	0	0	0	0	1	0	Juvenile	Downstream
2123H	0	0	0	0	0	1	Juvenile	Downstream
2146H	1	0	1	0	0	1	Juvenile	Downstream
2155H	1	0	0	0	0	0	Juvenile	Downstream
2159H	0	1	0	0	0	0	Juvenile	Downstream
2176H	0	0	1	1	0	0	Juvenile	Downstream
2187H	0	0	0	1	0	0	Juvenile	Downstream
2212H	0	0	0	0	0	1	Juvenile	Downstream
2221H	1	0	1	0	0	0	Juvenile	Downstream
2223H	1	0	0	0	0	0	Juvenile	Downstream
2227H	1	1	0	0	0	0	Juvenile	Downstream
2228H	1	0	0	0	0	1	Juvenile	Downstream
2229H	1	0	0	0	0	0	Juvenile	Downstream
2233H	1	0	1	1	0	0	Juvenile	Downstream
2234H	1	0	0	0	0	0	Juvenile	Downstream
2235H	1	0	0	1	0	0	Juvenile	Downstream
2237H	0	1	0	1	1	0	Juvenile	Downstream
2258H	0	0	1	0	0	0	Juvenile	Downstream
2277H	0	0	0	1	0	0	Juvenile	Downstream
2280H	0	0	0	1	0	0	Juvenile	Downstream
2288H	0	0	0	0	1	0	Juvenile	Downstream
2290H	0	0	0	0	1	0	Juvenile	Downstream
83c0325	1	1	0	0	0	0	Adult	Downstream
83c0335	0	1	0	0	0	0	Adult	Downstream
83c0336	0	1	0	0	0	0	Adult	Downstream
83c0340	1	0	1	0	0	0	Adult	Downstream
83c0341	0	0	1	0	0	0	Adult	Downstream
83c034c	0	1	0	0	0	0	Adult	Downstream
83c0356	0	0	1	0	0	0	Adult	Downstream
83c0358	0	0	0	0	0	1	Adult	Upstream
83c0365	1	0	0	0	0	0	Adult	Downstream
83c036a	1	0	0	0	0	0	Adult	Downstream
83c0372	1	0	0	0	0	0	Adult	Downstream
83c037b	1	0	0	0	0	0	Adult	Downstream
83c339a	0	0	1	0	0	0	Adult	Downstream
83c33b3	0	1	0	0	0	0	Adult	Downstream
83c33bf	0	1	0	0	0	0	Adult	Downstream
83c33D4	0	0	1	0	0	0	Adult	Downstream
852ee23	0	1	0	0	0	0	Adult	Downstream
852ee28	0	0	0	1	0	0	Adult	Downstream
852ee38	0	1	0	0	0	0	Adult	Downstream
852ee3a	0	0	1	0	0	0	Adult	Downstream
852ee3e	0	0	1	0	0	0	Adult	Downstream
852ee3f	0	1	0	0	0	0	Adult	Downstream
852ee40	0	0	0	0	1	0	Adult	Downstream
852ee4a	0	0	0	0	1	0	Adult	Downstream
852ee51	0	0	0	0	1	0	Adult	Downstream
852ee55	0	0	1	0	0	0	Adult	Downstream
852ee56	1	0	0	0	0	0	Adult	Downstream
852ee5c	0	0	0	0	0	1	Adult	Downstream
852ee68	0	0	1	0	0	0	Adult	Downstream
852ee6a	0	0	1	0	0	0	Adult	Downstream
852ee73	0	0	1	0	0	0	Adult	Downstream
852ee74	0	0	1	0	0	0	Adult	Downstream
852ee79	0	0	0	0	1	0	Adult	Downstream
852ee7b	0	1	1	0	0	0	Adult	Downstream
852ee7d	1	0	0	0	0	0	Adult	Downstream
852ee83	0	0	1	0	0	0	Adult	Downstream
