# Supplementary material for: Comparison of hoop-net trapping and visual surveys to monitor abundance of the Rio Grande cooter (Pseudemys gorzugi)
Source: PeerJ. 2018 May 11;6:e4677. doi: 10.7717/peerj.4677 (PMC5951123; doi:10.7717/peerj.4677)
Supplement: Supplemental Information 2 — Raw data set of six visual distance surveys of Rio Grande cooter, including survey occasion, perpendicular distance of turtle from the observer, and class (adult or juvenile). [file peerj-06-4677-s002.xlsx]

## Sheet: ALL
Survey No	distance (m)	Class
1	3	Adult
1	4	Adult
1	4	Adult
1	4	Adult
1	4	Adult
1	4	Adult
1	5	Adult
1	5	Adult
1	6	Adult
1	2	Juvenile
1	4	Juvenile
1	4	Juvenile
1	4	Juvenile
1	4	Juvenile
1	4	Juvenile
1	4	Juvenile
1	4	Juvenile
1	5	Juvenile
2	1	Adult
2	2	Adult
2	2	Adult
2	3	Adult
2	3	Adult
2	3	Adult
2	4	Adult
2	4	Adult
2	4	Adult
2	4	Adult
2	4	Adult
2	4	Adult
2	4	Adult
2	4	Adult
2	4	Adult
2	4	Adult
2	4	Adult
2	4	Adult
2	5	Adult
2	5	Adult
2	6	Adult
2	6	Adult
2	6	Adult
2	6	Adult
2	6	Adult
2	6	Adult
2	6	Adult
2	6	Adult
2	6	Adult
2	6	Adult
2	7	Adult
2	7	Adult
2	7	Adult
2	7	Adult
2	7	Adult
2	7	Adult
2	7	Adult
2	1	Juvenile
2	1	Juvenile
2	1	Juvenile
2	1	Juvenile
3	2	Adult
3	2	Adult
3	2	Adult
3	3	Adult
3	3	Adult
3	3	Adult
3	3	Adult
3	4	Adult
3	4	Adult
3	5	Adult
3	5	Adult
3	5	Adult
3	5	Adult
3	5	Adult
3	5	Adult
3	5	Adult
3	5	Adult
3	5	Adult
3	5	Adult
3	5	Adult
3	5	Adult
3	5	Adult
3	5	Adult
3	5	Adult
3	6	Adult
3	6	Adult
3	6	Adult
3	6	Adult
3	6	Adult
3	6	Adult
3	6	Adult
3	7	Adult
3	7	Adult
3	7	Adult
3	3	Juvenile
3	5	Juvenile
3	7	Juvenile
3	7	Juvenile
4	1	Adult
4	1	Adult
4	2	Adult
4	3	Adult
4	4	Adult
4	4	Adult
4	5	Adult
4	5	Adult
4	5	Adult
4	6	Adult
4	1	Juvenile
4	1	Juvenile
4	1	Juvenile
4	1	Juvenile
4	1	Juvenile
4	1	Juvenile
4	2	Juvenile
4	2	Juvenile
4	4	Juvenile
5	1	Adult
5	1	Adult
5	1	Adult
5	2	Adult
5	2	Adult
5	2	Adult
5	2	Adult
5	3	Adult
5	3	Adult
5	3	Adult
5	3	Adult
5	3	Adult
5	3	Adult
5	3	Adult
5	4	Adult
5	4	Adult
5	4	Adult
5	5	Adult
5	5	Adult
5	5	Adult
5	5	Adult
5	5	Adult
5	5	Adult
5	5	Adult
5	5	Adult
5	5	Adult
5	6	Adult
5	6	Adult
5	6	Adult
5	6	Adult
5	6	Adult
5	7	Adult
5	7	Adult
5	7	Adult
5	7	Adult
5	7	Adult
5	9	Adult
5	1	Juvenile
5	2	Juvenile
5	3	Juvenile
5	5	Juvenile
5	5	Juvenile
5	5	Juvenile
5	8	Juvenile
6	0	Adult
6	0	Adult
6	0	Adult
6	1	Adult
6	2	Adult
6	2	Adult
6	3	Adult
6	3	Adult
6	3	Adult
6	3	Adult
6	4	Adult
6	5	Adult
6	5	Adult
6	5	Adult
6	0	Juvenile
6	1	Juvenile
6	1	Juvenile
6	3	Juvenile
6	3	Juvenile
6	3	Juvenile
6	5	Juvenile
6	6	Juvenile
