# Supplementary material for: Comparison of hoop-net trapping and visual surveys to monitor abundance of the Rio Grande cooter (Pseudemys gorzugi)
Source: PeerJ. 2018 May 11;6:e4677. doi: 10.7717/peerj.4677 (PMC5951123; doi:10.7717/peerj.4677)
Supplement: Supplemental Information 4 — Data set containing C.W. Painter’s P. gorzugi capture data in years 1992, 1993, and 2000. This data was obtained from current New Mexico state herpetologist Leland Pierce. He compiled this data from C.W. Painter field notes. Painter was a state herpetologist for NMDGF for several decades (until his death in 2015). [file peerj-06-4677-s004.xlsx]

## Sheet: Sheet1
Black River	Locality	Date Opened	Time Opened	Number of Traps	Bait	Date Closed	Approximate Close	Approximate hours open	P. concinna (P. gorzugi)
	DS Pool	1992-06-24	1400	5	sardines	1992-06-25	900	19
	Twin Cottonwood	1992-06-24	1500	7	sardines	1992-06-25	1000	19	1
	Headwater	1992-06-24	1630	3	sardines	1992-06-25	1100	18.5
	East Fork	1992-06-24	1700	2	sardines	1992-06-25	1200	19	1
Black River	Locality	Start Date	Start Time	Number of Traps	Bait	End Date	End Time	Approximate Hours Open	P. concinna (P. gorzugi)
	Additional Basking Pool Trap	1993-04-28	1445	1	sardines	1993-05-03	1030	115.75	3
	Basking Pool	1993-04-28	1445	7	sardines	1993-04-29	1045	20	8
	Basking Pool	1993-05-03	1330	13	sardines	1993-05-04	1000	22.5	5
	Basking Pool	1993-05-04	1000	11	sardines	1993-05-05	1200	26	9
	Diversion Dam	1993-04-30	1500	3	sardines	1993-05-01	1000	19
	Diversion Dam	1993-05-01	1430	10	sardines	1993-05-02	930	19	1
	Diversion Dam	1993-05-02	930	10	sardines	1993-05-03	830	23	2
	Headwater	1993-04-28	1600	9	sardines	1993-04-29	930	17.5	2
	Powerline Pool	1993-04-28	1350	5	sardines	1993-04-29	1100	21.167	6
Black River	Locality	Date Opened	Time Opened	Number of Traps	Bait	Date Checked	Approximate Time	Approximate hours open	P. concinna (P. gorzugi)
	All Sites	2000-09-26	1445	14	sardines	2000-09-27	1000	19.25	1
